# Supplementary material
Source: publisher site journal article supplement (https://www.dovepress.com/get_supplementary_file.php?f=240953.docx)
Supplement: Supplementary file 1 [file get_supplementary_file.php]

**Multifunctional superparamagnetic iron oxide nanoparticles conjugated with Aβ oligomer-specific scFv antibody and class A scavenger receptor activator show early diagnostic potentials for Alzheimer’s Disease**

Xiao-ge Liu 1,2, Lun Zhang 1,2, Shuai Lu 1, Dong-qun Liu 1,2, Ling-xiao Zhang 1,2, Xiao-lin Yu 1*, Rui-tian Liu 1*

1 *State Key Laboratory of Biochemical Engineering, Institute of Process Engineering, Chinese Academy of Sciences, Beijing 100190, China*

2 *School of Chemistry and Chemical Engineering, University of Chinese Academy of Science, Beijing 100049, China*

*Corresponding authors.

Rui-tian Liu

Email: rtliu@ipe.ac.cn; Fax: +86 10 82545075; Tel: +86 10 82545017

or

Xiao-lin Yu

Email: yuxiaolin@ipe.ac.cn; Fax: +86 10 82545025; Tel: +86 10 82545025


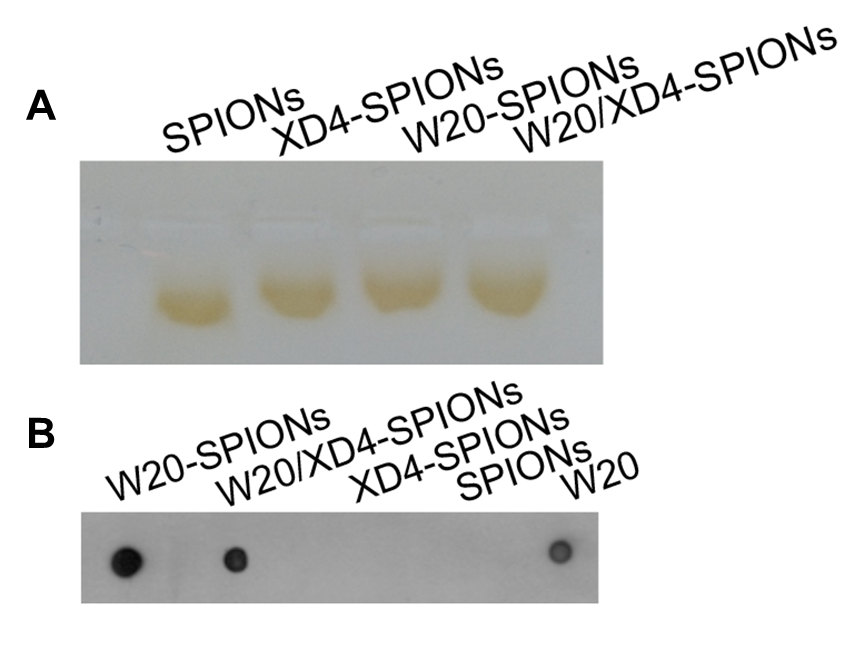


Figure S1. Characterization of W20/XD4-SPIONs. (A) Gel electrophoresis in 1% agarose of unconjugated-SPIONs, XD4-, W20- and W20/XD4-SPIONs. (B) W20 conjugated on the nanoparticles was detected by dot-blot using anti-c-myc antibody.

*
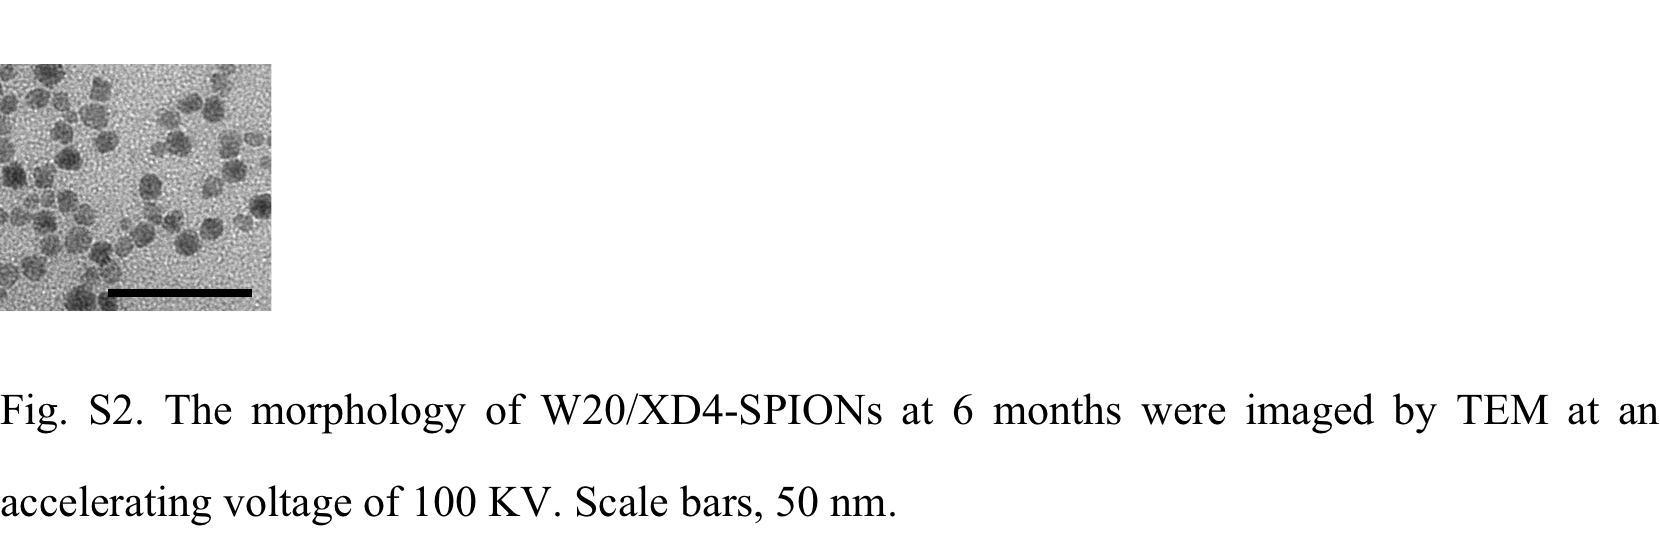
*

Figure S2. The morphology of W20/XD4-SPIONs at 6 months were imaged by TEM at an accelerating voltage of 100 KV. Scale bars, 50 nm.

Figure S3. Fe content in the brain lysate of BALB/c mice intravenously injected with mannitol combined with unconjugated-SPIONs, W20-, XD4-, or W20/XD4-SPIONs was determined by inductively coupled plasma spectrometry (ICP).


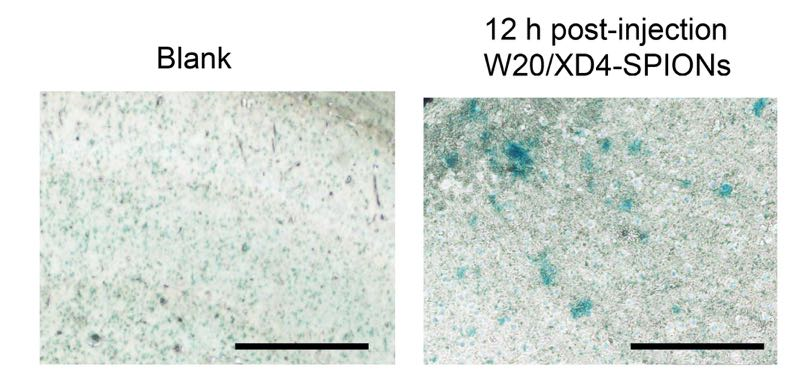


Figure S4. Prussian blue staining in the hippocampus area of AD mice treated with or without W20/XD4-SPIONs 12 h later. Scale bars, 100 μm.

Table S1. The conjugative efficiency of W20 and XD4 on nanoparticles

| mg/mg (input) | mol/mol (input) | mg/mg (output) | mol/mol (output) | conjugative efficiency |
| --- | --- | --- | --- | --- |
| W20:XD4= 1:0.1 | 1:3 | 0.5118 / 0.0192 | 1:1 | 51.18% / 19.2% |
| W20 = 1 |  | 0.5612 | | 56.12% |
| XD4 = 0.1 |  | 0.0511 | | 51.1% |
